# Supplementary material for: Exposure and Risk Assessment to Airborne dl-PCBs and Dioxins in the Population Living in the Neighborhood of a Cement Plant: A Pilot Study in the Valencian Region of Spain
Source: MDPI journal article supplement (doi:10.3390/toxics11040389), 2023-04-20
Supplement: s1 [file s1]

## **Section S-1. Analytical performance parameters and identification criteria**

To identify and confirm the analyzed compounds, the criteria described in Commission Regulation 2017/771 (EU, 2017) and EPA method 1613 (USEPA, 2014) have been used:

- a) The absolute retention time obtained in the verification test for internal standards  $^{13}\text{C}_{12}$ -1,2,3,4-TCDD and  $^{13}\text{C}_{12}$ -1,2,3,7,8,9-HxCDD must not exceed  $\pm 15$  seconds with respect to retention times obtained in the calibration curve.
- b) The ratio of the ions (qualifier and quantifier) must not show a difference of more than 15% with respect to the theoretical values.
- c) The resolution of the instrument maintained at 10,000 (10% valley).
- d) The standard deviation of the relative response factors of the response factors should be used to evaluate each calibration curve.
- e) Spiked samples at three different concentration levels must be used as quality control of the native compounds (dioxins and dl-PCB). A 20% difference in recoveries will be considered acceptable.
- f) The range of recoveries of the surrogates (EPA 1613-LCS and WP-LCS) should be between 60-120 %, except for OCDD (50-100 %).

**Table S1.** Sampling dates of the analyzed filters and total sample volume (m<sup>3</sup>).

| <b>Estación</b> | <b>Date filter 1</b> | <b>Date filter 2</b> | <b>Total volume (m<sup>3</sup>)</b> | <b>Code</b> |
|-----------------|----------------------|----------------------|-------------------------------------|-------------|
| Chiva           | 25/02/2020           | 04/03/2020           | 1473.31                             | C1          |
|                 | 12/03/2020           | 13/03/2020           | 1453.25                             | C2          |
|                 | 28/03/2020           | 29/03/2020           | 1448.20                             | C3          |
|                 | 03/04/2020           | 05/04/2020           | 1444.14                             | C4          |
|                 | 09/04/2020           | 10/04/2020           | 1453.94                             | C5          |
|                 | 28/04/2020           | 29/04/2020           | 1460.58                             | C6          |
|                 | 06/05/2020           | 07/05/2020           | 1466.30                             | C7          |
|                 | 12/05/2020           | 14/05/2020           | 1457.44                             | C8          |
|                 | 22/05/2020           | 23/05/2020           | 1471.85                             | C9          |
|                 | 30/05/2020           | 31/05/2020           | 1470.17                             | C10         |
|                 | 01/06/2020           | 02/06/2020           | 1471.85                             | C11         |
|                 | 04/06/2020           | 05/06/2020           | 1469.78                             | C12         |
|                 | 16/06/2020           | 17/06/2020           | 1469.14                             | C13         |
| Buñol           | 04/08/2020           | 05/08/2020           | 1454.05                             | B1          |
|                 | 20/08/2020           | 21/08/2020           | 1460.07                             | B2          |
|                 | 28/08/2020           | 29/08/2020           | 1457.37                             | B3          |
|                 | 31/08/2020           | 01/09/2020           | 1443.88                             | B4          |
|                 | 05/09/2020           | 06/09/2020           | 1443.88                             | B5          |
|                 | 08/09/2020           | 09/09/2020           | 1435.79                             | B6          |
|                 | 24/09/2020           | 25/09/2020           | 1440.51                             | B7          |
|                 | 29/09/2020           | 30/09/2020           | 1436.46                             | B8          |
|                 | 06/10/2020           | 07/10/2020           | 1439.88                             | B9          |
|                 | 13/10/2020           | 14/10/2020           | 1438.70                             | B10         |

**Table S2.** Inhalation Unit risk ( $\mu\text{g}/\text{m}^3$ )<sup>-1</sup> and Slope Factor  $\left(\frac{\text{mg}}{\text{kg day}^{-1}}\right)^{-1}$

| Analyte             | IUR ( $\mu\text{g}/\text{m}^3$ ) <sup>-1</sup> | SF ( $\text{mg}/\text{kg day}^{-1}$ ) <sup>-1</sup> |
|---------------------|------------------------------------------------|-----------------------------------------------------|
| PCB-81              | 0.0110                                         | 38.5                                                |
| PCB-77              | 0.0038                                         | 13.3                                                |
| PCB-123             | 0.0011                                         | 3.85                                                |
| PCB-118             | 0.0011                                         | 3.85                                                |
| PCB-114             | 0.0011                                         | 3.85                                                |
| PCB-105             | 0.0011                                         | 3.85                                                |
| PCB-126             | 38.000                                         | 13300                                               |
| PCB-167             | 0.0011                                         | 3.85                                                |
| PCB-157             | 0.0011                                         | 3.85                                                |
| PCB-156             | 0.0011                                         | 3.85                                                |
| PCB-169             | 11.000                                         | 3850                                                |
| PCB-189             | 0.0011                                         | 3.85                                                |
| 2,3,7,8-TCDF        | 38.000                                         | 13300                                               |
| 2,3,7,8-TCDD        | 380.000                                        | 133000                                              |
| 1,2,3,7,8-PCDF      | 11.000                                         | 3850                                                |
| 2,3,4,7,8-PCDF      | 110.000                                        | 38500                                               |
| 1,2,3,7,8-PCDD      | 380.000                                        | 133000                                              |
| 1,2,3,4,7,8-HxCDF   | 38.000                                         | 13300                                               |
| 1,2,3,6,7,8-HxCDF   | 38.000                                         | 13300                                               |
| 2,3,4,6,7,8-HxCDF   | 38.000                                         | 13300                                               |
| 1,2,3,7,8,9-HxCDF   | 38.000                                         | 13300                                               |
| 1,2,3,4,7,8-HxCDD   | 38.000                                         | 13300                                               |
| 1,2,3,6,7,8-HxCDD   | 38.000                                         | 13300                                               |
| 1,2,3,7,8,9-HxCDD   | 38.000                                         | 13300                                               |
| 1,2,3,4,6,7,8-HpCDF | 0.3800                                         | 1330                                                |
| 1,2,3,4,7,8,9-HpCDF | 0.3800                                         | 1330                                                |
| 1,2,3,4,6,7,8-HpCDD | 0.3800                                         | 1330                                                |
| OCDF                | 0.0110                                         | 38.5                                                |
| OCDD                | 0.0110                                         | 38.5                                                |

**Table S3.** Concentrations of  $\Sigma$ PCDD / Fs + dl-PCBs,  $\Sigma$  dl-PCBs and  $\Sigma$  PCDD / Fs obtained at Chiva (C) and Buñol (B) stations in fg TEQ / m<sup>3</sup>

| <b>Muestras</b>         | <b><math>\Sigma</math> dl-PCBs</b> | <b><math>\Sigma</math> PCDD/Fs</b> | <b><math>\Sigma</math> (PCDD/Fs + dl-PCBs)</b> |
|-------------------------|------------------------------------|------------------------------------|------------------------------------------------|
| <b>C1 (25/02-04/03)</b> | 1.45                               | 2.62                               | 4.06                                           |
| <b>C2 (12-13/03)</b>    | 1.44                               | 4.98                               | 6.43                                           |
| <b>C3 (28-29/03)</b>    | 1.15                               | 4.58                               | 5.74                                           |
| <b>C4 (03-05/04)</b>    | 1.42                               | 3.51                               | 4.93                                           |
| <b>C5 (09-10/04)</b>    | 0.59                               | 2.68                               | 3.26                                           |
| <b>C6 (28-29/04)</b>    | 1.42                               | 2.68                               | 4.10                                           |
| <b>C7 (06-07/05)</b>    | 1.85                               | 4.07                               | 5.92                                           |
| <b>C8 (12-14/05)</b>    | 0.96                               | 2.34                               | 3.30                                           |
| <b>C9 (22-23/05)</b>    | 3.03                               | 13.38                              | 16.41                                          |
| <b>C10 (30-31/05)</b>   | 1.46                               | 1.81                               | 3.26                                           |
| <b>C11 (01-02/06)</b>   | 1.87                               | 40.66                              | 42.53                                          |
| <b>C12 (04-05/06)</b>   | 0.99                               | 39.15                              | 40.13                                          |
| <b>C13 (16-17/06)</b>   | 1.02                               | 30.26                              | 31.28                                          |
| <b>B1 (04-05/08)</b>    | 0.98                               | 3.16                               | 4.14                                           |
| <b>B2 (20-21/08)</b>    | 1.39                               | 2.66                               | 4.05                                           |
| <b>B3 (28-29/08)</b>    | 1.42                               | 1.95                               | 3.36                                           |
| <b>B4 (31/08-01/09)</b> | 1.43                               | 1.29                               | 2.72                                           |
| <b>B5 (05-06/09)</b>    | 0.95                               | 1.22                               | 2.17                                           |
| <b>B6 (08-09/09)</b>    | 0.99                               | 0.86                               | 1.85                                           |
| <b>B7 (24-25/09)</b>    | 0.51                               | 1.37                               | 1.88                                           |
| <b>B8 (29-30/09)</b>    | 1.44                               | 1.83                               | 3.27                                           |
| <b>B9 (06-07/10)</b>    | 1.60                               | 2.47                               | 4.06                                           |
| <b>B10 (13/14-10)</b>   | 2.36                               | 1.52                               | 3.87                                           |

**Table S4. Exposure of dioxins and furans in adults in the vicinity of cement plants**

| Studies                   | Year | Country                                | DID<br>(pg WHO TEQ kg <sup>-1</sup> b.w. day <sup>-1</sup> ) |
|---------------------------|------|----------------------------------------|--------------------------------------------------------------|
| <i>Rovira et al. 2015</i> | 2011 | Sta. Margarida i els Monjos, Catalonia | 2.5*10 <sup>-3</sup>                                         |
|                           | 2012 |                                        | 2.6*10 <sup>-3</sup>                                         |
| <i>Mari et al. 2017</i>   | 2013 | Sant Vicenç dels Horts, Catalonia      | NA                                                           |
|                           | 2015 |                                        | 2.1*10 <sup>-3</sup>                                         |
| <i>Rovira et al. 2016</i> | 2014 | Montcada, Catalonia                    | 1.2*10 <sup>-2</sup>                                         |
| <i>Mari et al. 2018</i>   | 2017 | Alcanar, Catalonia                     | 2.8*10 <sup>-3</sup>                                         |

NA= Not available

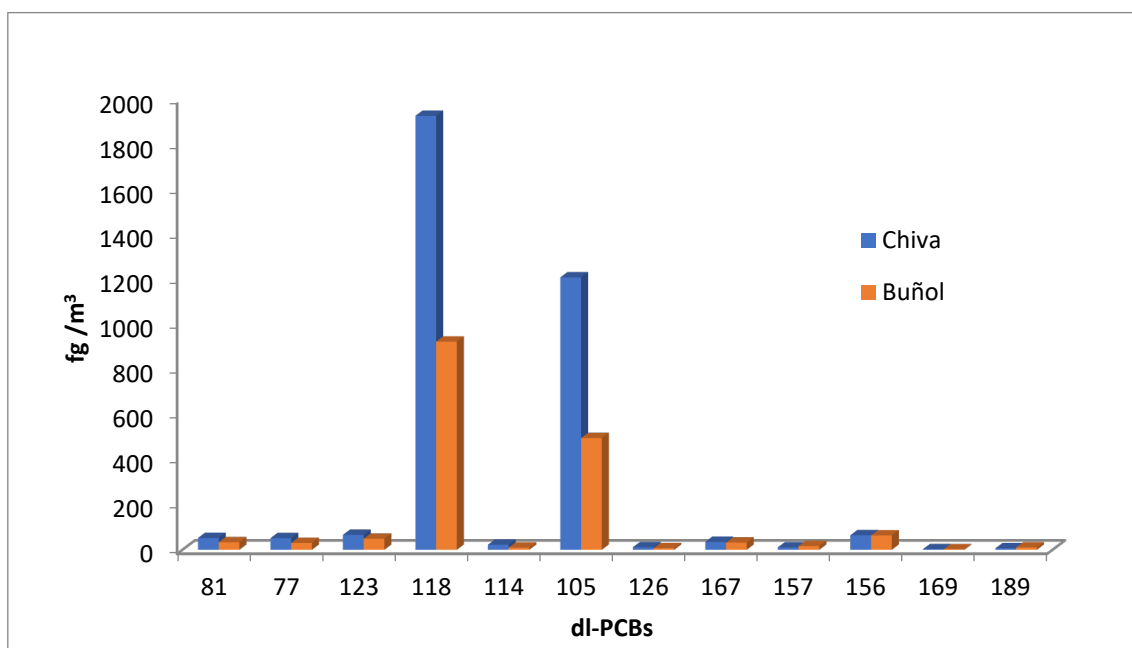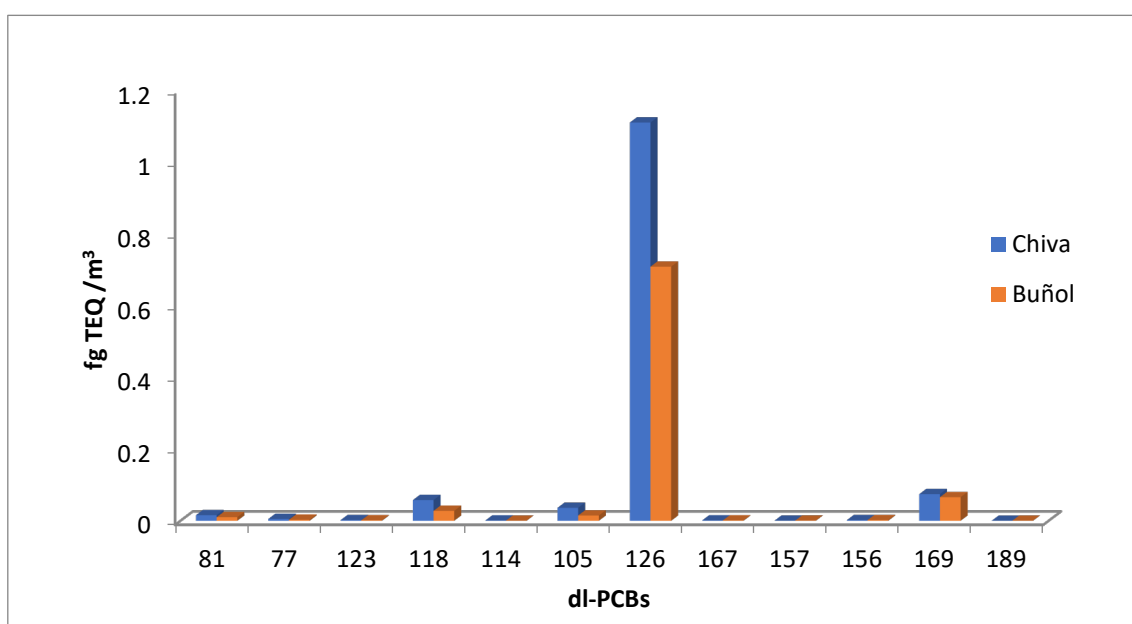

**Figure S1.** Profile of concentrations of dl-PCBs detected at Chiva and Buñol stations using concentrations ( $\text{fg} / \text{m}^3$ ) and toxic equivalents (TEQ) ( $\text{fg TEQ} / \text{m}^3$ ).

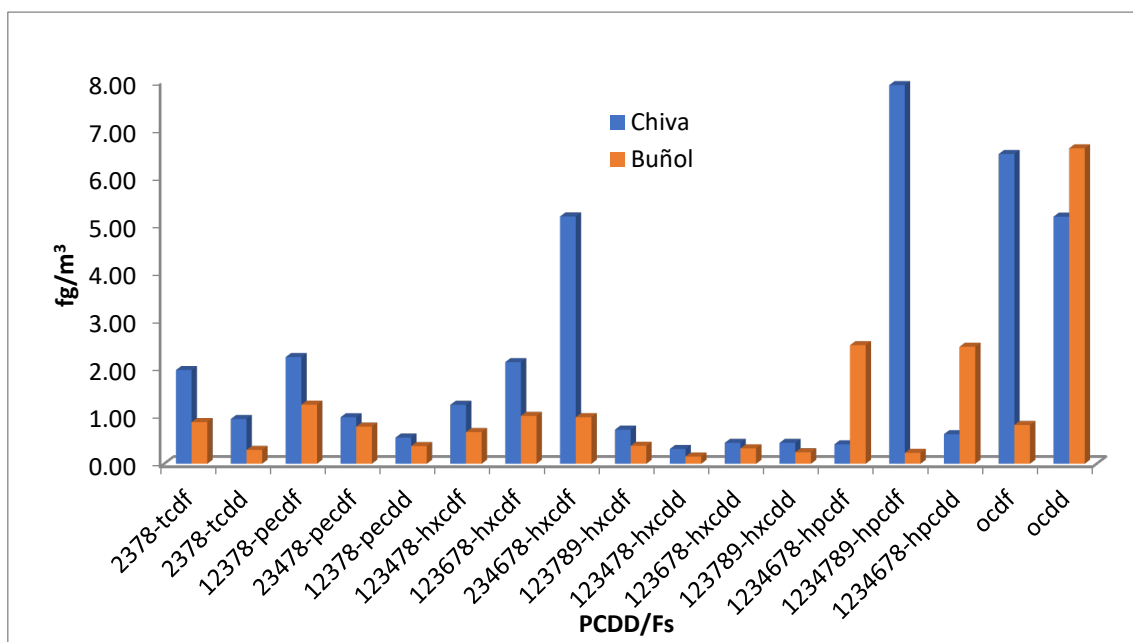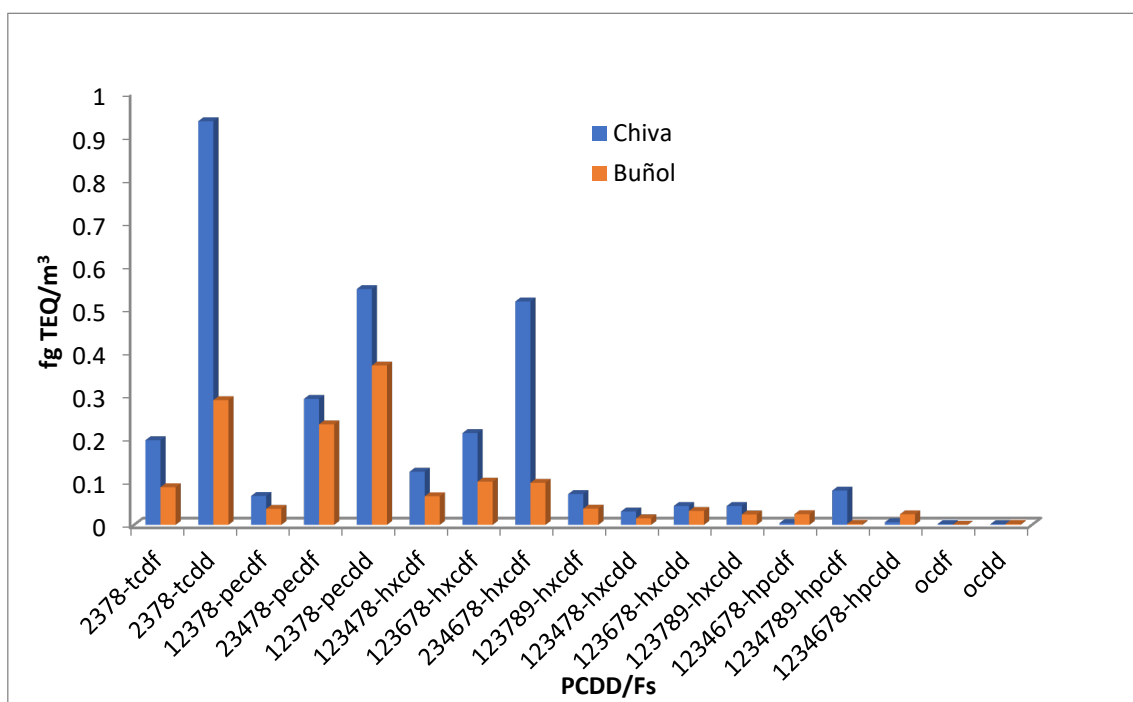

**Figure S2.** Profile of concentrations of PCDD/Fs detected at Chiva and Buñol stations using concentrations (fg / m³) and toxic equivalents (TEQ) (fg TEQ / m³).
